# Supplementary material for: Topology and Contribution to the Pore Channel Lining of Plasma Membrane-Embedded Shigella flexneri Type 3 Secretion Translocase IpaB
Source: PubMed Central journal article supplement (PMC8609354; doi:10.1128/mbio.03021-21), 2021-11-23
Supplement: mbio.03021-21-sf001.pdf [file mbio.03021-21-sf001.pdf]

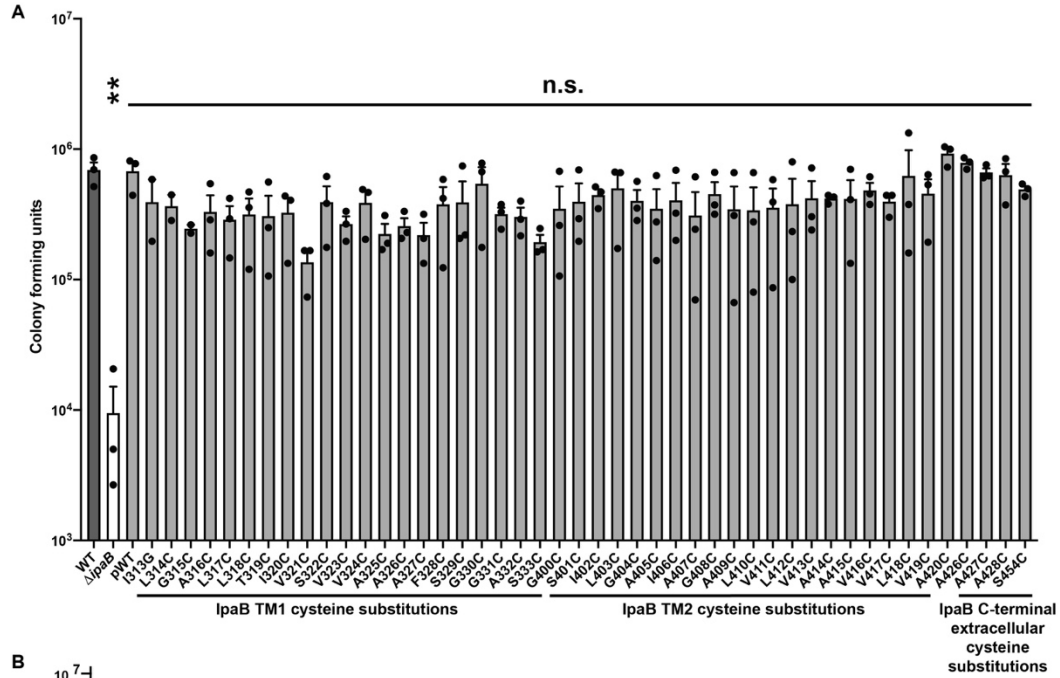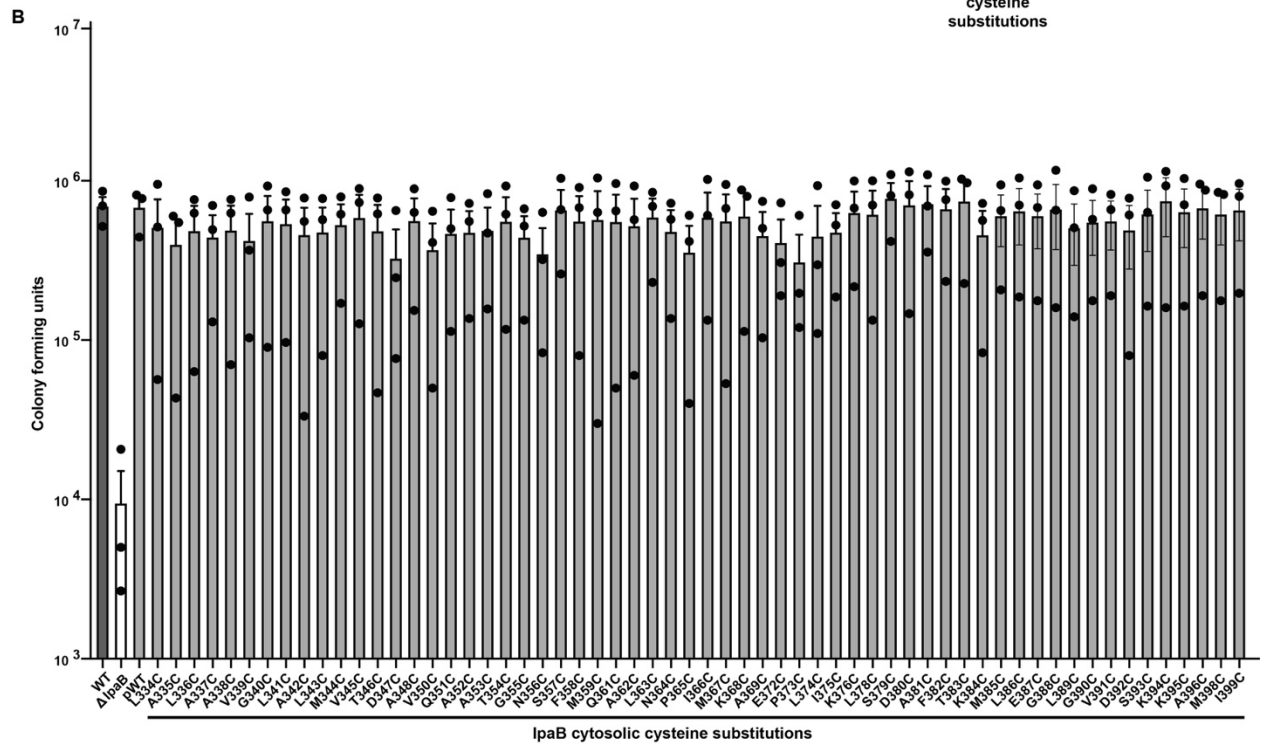

1 **Supplemental Figure 1.** Cysteine substitutions in IpaB do not alter *S. flexneri* invasion  
2 into host cells. Infection of HeLa monolayers with *S. flexneri*  $\Delta$ *ipaB* expressing wildtype  
3 IpaB or a single IpaB cysteine substitution derivative. Positive control, wildtype *S.*  
4 *flexneri*. Negative control, *S. flexneri*  $\Delta$ *ipaB*. Quantification of colony forming units from  
5 three independent experiments. (A) IpaB cysteine derivatives within TM1, TM2, and C-  
6 terminal extracellular domain. Means  $\pm$  SEM are plotted. Black dots represent values  
7 obtained from individual experiments. \*\*,  $p < 0.01$ ; ANOVA with Dunnett's *post hoc* test  
8 comparing colony forming units of *S. flexneri*  $\Delta$ *ipaB*, *S. flexneri*  $\Delta$ *ipaB* expressing each  
9 IpaB cysteine derivative, and *S. flexneri*  $\Delta$ *ipaB* expressing WT IpaB (pWT) to colony  
10 forming units of WT *S. flexneri*. (B) IpaB cysteine derivatives within the cytosolic region.  
11 The trends observed for data in panel B do not reach statistical significance.
