# Supplementary material for: Topology and Contribution to the Pore Channel Lining of Plasma Membrane-Embedded Shigella flexneri Type 3 Secretion Translocase IpaB
Source: PubMed Central journal article supplement (PMC8609354; doi:10.1128/mbio.03021-21), 2021-11-23
Supplement: mbio.03021-21-sf002.pdf [file mbio.03021-21-sf002.pdf]

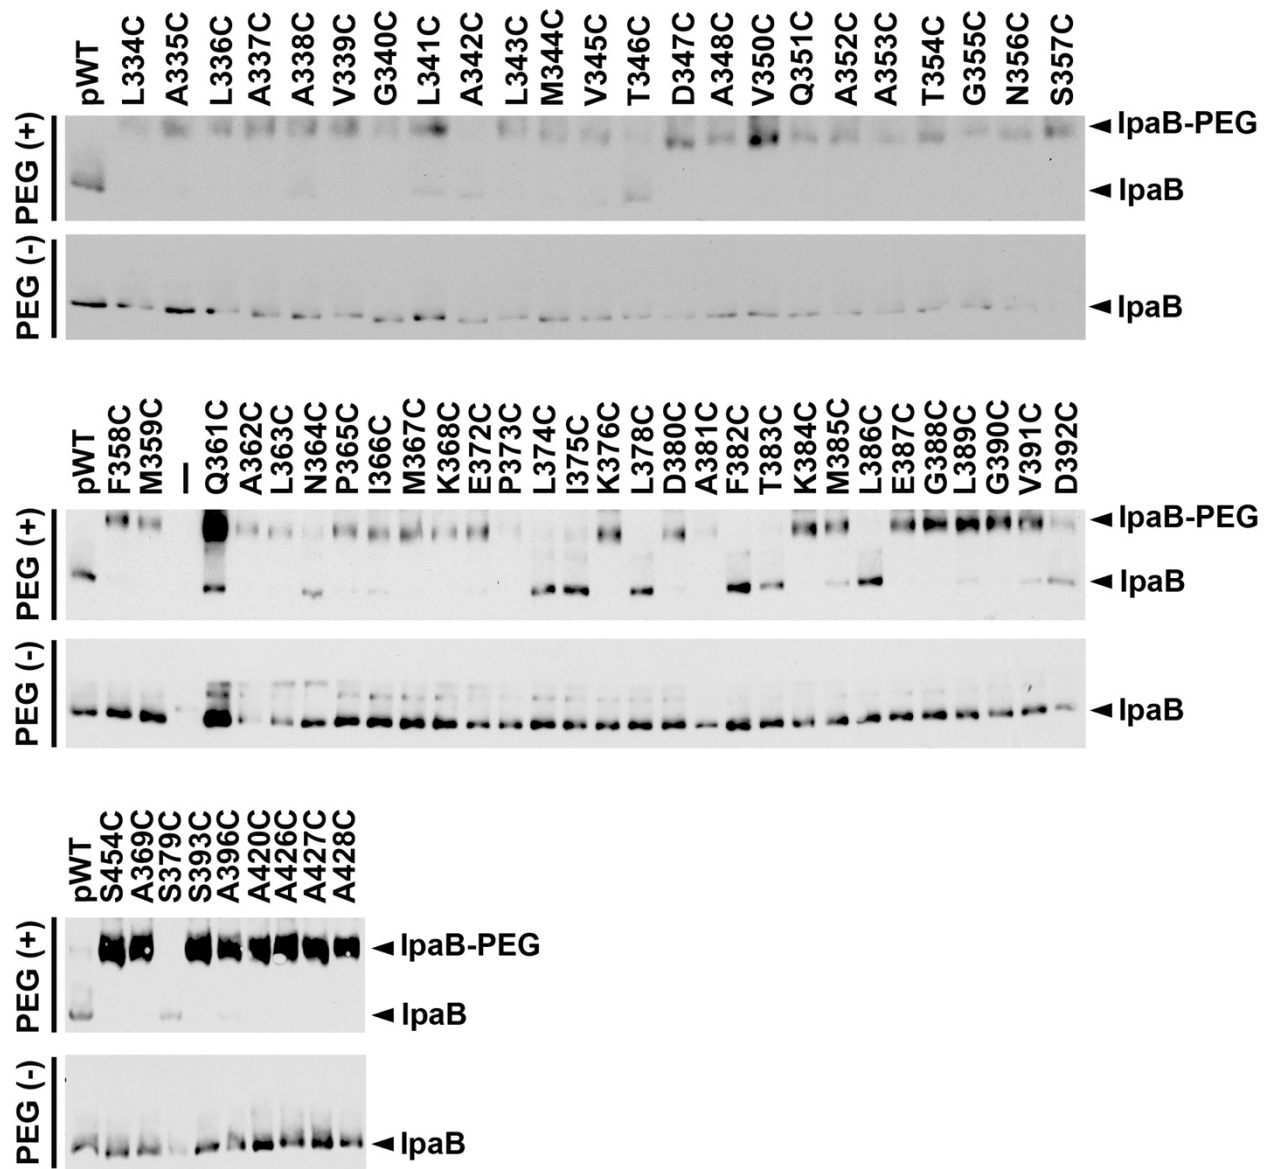

12

13 **Supplemental Figure 2.** In the context of soluble IpaB, most cysteine substitutions  
 14 along the cytosolic domain of IpaB are accessible. Gel migration of PEG5000-  
 15 maleimide labeled (IpaB-PEG) or unlabeled (IpaB) soluble IpaB in culture supernatants  
 16 of indicated strains following chemical activation of type 3 secretion with Congo red. *S.*  
 17 *flexneri*  $\Delta ipaB$  expressing wildtype (pWT) IpaB or a single IpaB cysteine substitution  
 18 derivative. Representative western blots.
