# Supplementary material for: Topology and Contribution to the Pore Channel Lining of Plasma Membrane-Embedded Shigella flexneri Type 3 Secretion Translocase IpaB
Source: PubMed Central journal article supplement (PMC8609354; doi:10.1128/mbio.03021-21), 2021-11-23
Supplement: mbio.03021-21-sf003.pdf [file mbio.03021-21-sf003.pdf]

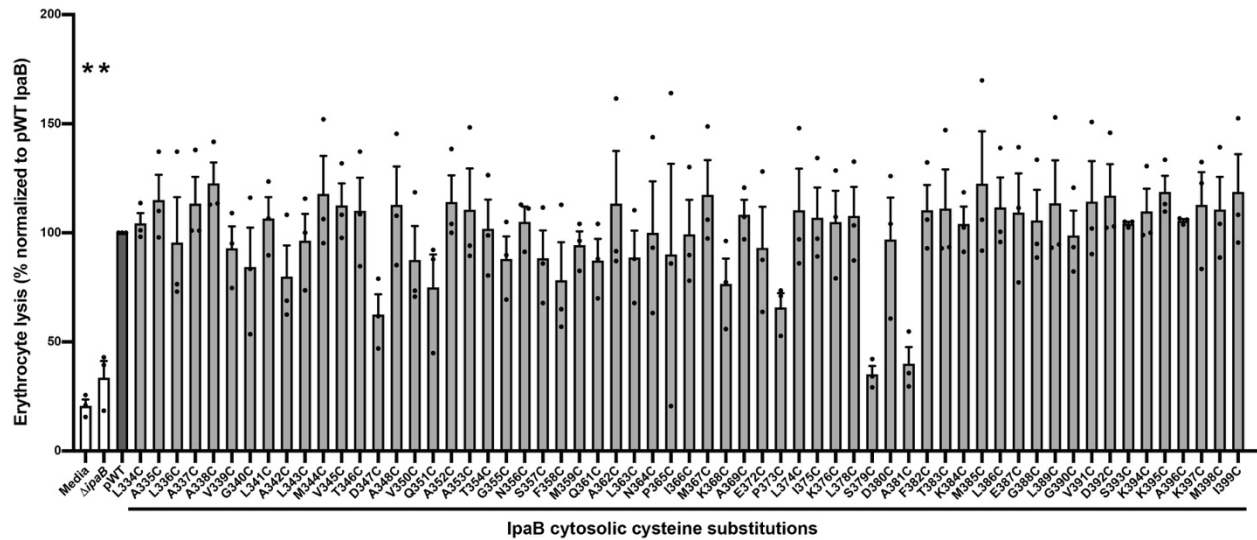

19

20 **Supplemental Figure 3.** Efficiency of pore formation by *S. flexneri* strains expressing  
 21 single cysteine substitutions in IpaB. Quantification of hemoglobin release upon  
 22 infection of sheep erythrocytes with *S. flexneri*  $\Delta$ *IpaB*, *S. flexneri*  $\Delta$ *IpaB* expressing  
 23 wildtype IpaB (pWT) or a single cysteine substitution derivative. The abundance of  
 24 hemoglobin release was quantified at  $A_{570}$  from at least three independent experiments.  
 25 Means  $\pm$  SEM are plotted. Black dots represent values obtained from individual  
 26 experiments. \*,  $p < 0.05$ ; ANOVA with Dunnett's *post hoc* test comparing each cysteine  
 27 substitution mutant to *S. flexneri*  $\Delta$ *IpaB* producing WT IpaB (pWT); the difference for  
 28 each other strain is not significant.
