# Supplementary material for: Topology and Contribution to the Pore Channel Lining of Plasma Membrane-Embedded Shigella flexneri Type 3 Secretion Translocase IpaB
Source: PubMed Central journal article supplement (PMC8609354; doi:10.1128/mbio.03021-21), 2021-11-23
Supplement: mbio.03021-21-sf004.pdf [file mbio.03021-21-sf004.pdf]

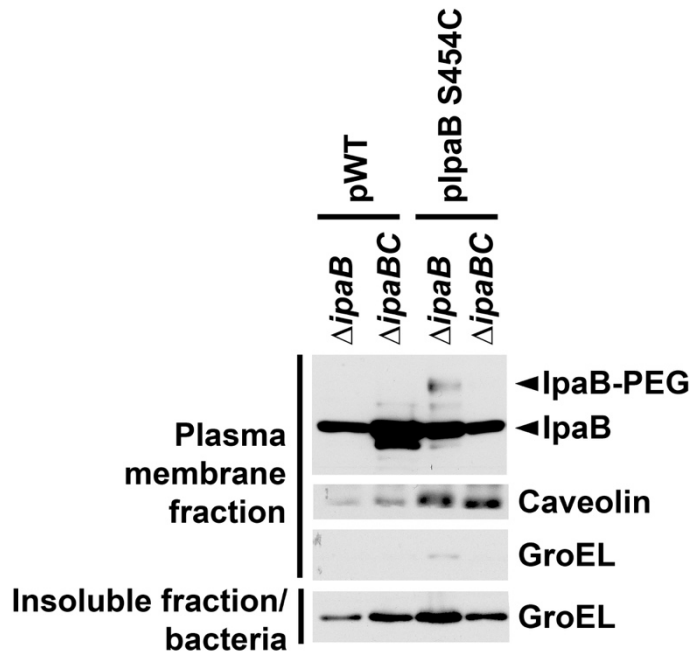

29

30 **Supplemental Figure 4.** In the absence of IpaC, membrane-associated IpaB C-  
 31 terminal cysteine substitution does not react to PEG5000-maleimide. Gel migration of  
 32 PEG5000-maleimide labeled (IpaB-PEG) or unlabeled (IpaB) IpaB in plasma membrane  
 33 enriched fractions. *S. flexneri*  $\Delta ipaB$  or  $\Delta ipaBC$  expressing wildtype (pWT) IpaB or the  
 34 IpaB cysteine substitution derivative S454C (pIpaB S454C). Positive control, *S. flexneri*  
 35  $\Delta ipaB$  expressing IpaB S454. IpaB S454C lies in the C-terminal extracellular domain  
 36 and is accessible to PEG5000-maleimide labeling in membrane inserted translocons  
 37 (Fig. 3). Caveolin-1, plasma membrane marker; GroEL, bacterial cytosolic protein.
