# Supplementary material for: Topology and Contribution to the Pore Channel Lining of Plasma Membrane-Embedded Shigella flexneri Type 3 Secretion Translocase IpaB
Source: PubMed Central journal article supplement (PMC8609354; doi:10.1128/mbio.03021-21), 2021-11-23
Supplement: mbio.03021-21-st001.pdf [file mbio.03021-21-st001.pdf]

## Supplemental Table

**Table S1. Strains used in this study**

| Strain                                 | Plasmid 1                       | Plasmid 2 | Relevant genotype                                                                                                                                                                                                                    | Source or reference            |
|----------------------------------------|---------------------------------|-----------|--------------------------------------------------------------------------------------------------------------------------------------------------------------------------------------------------------------------------------------|--------------------------------|
| <i>E. coli</i> DH10B                   |                                 |           | F <sup>-</sup> <i>mcrA</i> Δ( <i>mrr-hsdRMS-mcrBC</i> )<br>φ80 <i>lacZ</i> ΔM15 Δ <i>lacX74 recA1 endA1</i><br><i>araD139</i> Δ( <i>ara-leu</i> )7697 <i>galU galK</i> λ <sup>-</sup><br><i>rpsL</i> (Str <sup>R</sup> ) <i>nupG</i> | Thermo<br>Fisher<br>(18290015) |
| <i>E. coli</i> HB101                   | pIL22                           |           | pIL22 is pBR322 containing the pBR322<br>containing the AFA-I adhesin of<br>uropathogenic <i>E. coli</i> K552                                                                                                                        | (1)                            |
| <i>S. flexneri</i> 2457T               |                                 |           | Wildtype serotype 2a                                                                                                                                                                                                                 | (2)                            |
| <i>S. flexneri</i> 2457T Δ <i>ipaB</i> |                                 |           | Deletion of <i>ipaB</i>                                                                                                                                                                                                              | This study                     |
| <i>S. flexneri</i> 2457T Δ <i>acp</i>  |                                 |           | Deletion of <i>acp</i>                                                                                                                                                                                                               | This study                     |
| <i>S. flexneri</i> 2457T Δ <i>ipaB</i> | pDSW206-wildtype<br><i>ipaB</i> |           | Δ <i>ipaB</i> expressing wildtype <i>IpaB</i>                                                                                                                                                                                        | This study                     |

|                                               |                    |  |                                            |            |
|-----------------------------------------------|--------------------|--|--------------------------------------------|------------|
| <i>S. flexneri</i> 2457T $\Delta$ <i>ipaB</i> | pDSW206-IpaB C309S |  | $\Delta$ <i>ipaB</i> expressing IpaB C309S | This study |
| <i>S. flexneri</i> 2457T $\Delta$ <i>ipaB</i> | pDSW206-IpaB I313C |  | $\Delta$ <i>ipaB</i> expressing IpaB I313C | This study |
| <i>S. flexneri</i> 2457T $\Delta$ <i>ipaB</i> | pDSW206-IpaB L314C |  | $\Delta$ <i>ipaB</i> expressing IpaB L314C | This study |
| <i>S. flexneri</i> 2457T $\Delta$ <i>ipaB</i> | pDSW206-IpaB G315C |  | $\Delta$ <i>ipaB</i> expressing IpaB G315C | This study |
| <i>S. flexneri</i> 2457T $\Delta$ <i>ipaB</i> | pDSW206-IpaB A316C |  | $\Delta$ <i>ipaB</i> expressing IpaB A316C | This study |
| <i>S. flexneri</i> 2457T $\Delta$ <i>ipaB</i> | pDSW206-IpaB L317C |  | $\Delta$ <i>ipaB</i> expressing IpaB L317C | This study |
| <i>S. flexneri</i> 2457T $\Delta$ <i>ipaB</i> | pDSW206-IpaB L318C |  | $\Delta$ <i>ipaB</i> expressing IpaB L318C | This study |
| <i>S. flexneri</i> 2457T $\Delta$ <i>ipaB</i> | pDSW206-IpaB T319C |  | $\Delta$ <i>ipaB</i> expressing IpaB T319C | This study |
| <i>S. flexneri</i> 2457T $\Delta$ <i>ipaB</i> | pDSW206-IpaB I320C |  | $\Delta$ <i>ipaB</i> expressing IpaB I320C | This study |
| <i>S. flexneri</i> 2457T $\Delta$ <i>ipaB</i> | pDSW206-IpaB V321C |  | $\Delta$ <i>ipaB</i> expressing IpaB V321C | This study |
| <i>S. flexneri</i> 2457T $\Delta$ <i>ipaB</i> | pDSW206-IpaB S322C |  | $\Delta$ <i>ipaB</i> expressing IpaB S322C | This study |
| <i>S. flexneri</i> 2457T $\Delta$ <i>ipaB</i> | pDSW206-IpaB V323C |  | $\Delta$ <i>ipaB</i> expressing IpaB V323C | This study |
| <i>S. flexneri</i> 2457T $\Delta$ <i>ipaB</i> | pDSW206-IpaB V324C |  | $\Delta$ <i>ipaB</i> expressing IpaB V324C | This study |
| <i>S. flexneri</i> 2457T $\Delta$ <i>ipaB</i> | pDSW206-IpaB A325C |  | $\Delta$ <i>ipaB</i> expressing IpaB A325C | This study |
| <i>S. flexneri</i> 2457T $\Delta$ <i>ipaB</i> | pDSW206-IpaB A326C |  | $\Delta$ <i>ipaB</i> expressing IpaB A326C | This study |
| <i>S. flexneri</i> 2457T $\Delta$ <i>ipaB</i> | pDSW206-IpaB A327C |  | $\Delta$ <i>ipaB</i> expressing IpaB A327C | This study |
| <i>S. flexneri</i> 2457T $\Delta$ <i>ipaB</i> | pDSW206-IpaB F328C |  | $\Delta$ <i>ipaB</i> expressing IpaB F328C | This study |

|                                               |                    |  |                                            |            |
|-----------------------------------------------|--------------------|--|--------------------------------------------|------------|
| <i>S. flexneri</i> 2457T $\Delta$ <i>ipaB</i> | pDSW206-lpaB S329C |  | $\Delta$ <i>ipaB</i> expressing lpaB S329C | This study |
| <i>S. flexneri</i> 2457T $\Delta$ <i>ipaB</i> | pDSW206-lpaB G330C |  | $\Delta$ <i>ipaB</i> expressing lpaB G330C | This study |
| <i>S. flexneri</i> 2457T $\Delta$ <i>ipaB</i> | pDSW206-lpaB G331C |  | $\Delta$ <i>ipaB</i> expressing lpaB G331C | This study |
| <i>S. flexneri</i> 2457T $\Delta$ <i>ipaB</i> | pDSW206-lpaB A332C |  | $\Delta$ <i>ipaB</i> expressing lpaB A332C | This study |
| <i>S. flexneri</i> 2457T $\Delta$ <i>ipaB</i> | pDSW206-lpaB S333C |  | $\Delta$ <i>ipaB</i> expressing lpaB S333C | This study |
| <i>S. flexneri</i> 2457T $\Delta$ <i>ipaB</i> | pDSW206-lpaB L334C |  | $\Delta$ <i>ipaB</i> expressing lpaB L334C | This study |
| <i>S. flexneri</i> 2457T $\Delta$ <i>ipaB</i> | pDSW206-lpaB A335C |  | $\Delta$ <i>ipaB</i> expressing lpaB A335C | This study |
| <i>S. flexneri</i> 2457T $\Delta$ <i>ipaB</i> | pDSW206-lpaB L336C |  | $\Delta$ <i>ipaB</i> expressing lpaB L336C | This study |
| <i>S. flexneri</i> 2457T $\Delta$ <i>ipaB</i> | pDSW206-lpaB A337C |  | $\Delta$ <i>ipaB</i> expressing lpaB A337C | This study |
| <i>S. flexneri</i> 2457T $\Delta$ <i>ipaB</i> | pDSW206-lpaB A338C |  | $\Delta$ <i>ipaB</i> expressing lpaB A338C | This study |
| <i>S. flexneri</i> 2457T $\Delta$ <i>ipaB</i> | pDSW206-lpaB V339C |  | $\Delta$ <i>ipaB</i> expressing lpaB V339C | This study |
| <i>S. flexneri</i> 2457T $\Delta$ <i>ipaB</i> | pDSW206-lpaB G340C |  | $\Delta$ <i>ipaB</i> expressing lpaB G340C | This study |
| <i>S. flexneri</i> 2457T $\Delta$ <i>ipaB</i> | pDSW206-lpaB L341C |  | $\Delta$ <i>ipaB</i> expressing lpaB L341C | This study |
| <i>S. flexneri</i> 2457T $\Delta$ <i>ipaB</i> | pDSW206-lpaB A342C |  | $\Delta$ <i>ipaB</i> expressing lpaB A342C | This study |
| <i>S. flexneri</i> 2457T $\Delta$ <i>ipaB</i> | pDSW206-lpaB L343C |  | $\Delta$ <i>ipaB</i> expressing lpaB L343C | This study |
| <i>S. flexneri</i> 2457T $\Delta$ <i>ipaB</i> | pDSW206-lpaB M344C |  | $\Delta$ <i>ipaB</i> expressing lpaB M344C | This study |
| <i>S. flexneri</i> 2457T $\Delta$ <i>ipaB</i> | pDSW206-lpaB V345C |  | $\Delta$ <i>ipaB</i> expressing lpaB V345C | This study |

|                                               |                    |  |                                            |            |
|-----------------------------------------------|--------------------|--|--------------------------------------------|------------|
| <i>S. flexneri</i> 2457T $\Delta$ <i>ipaB</i> | pDSW206-lpaB T346C |  | $\Delta$ <i>ipaB</i> expressing lpaB T346C | This study |
| <i>S. flexneri</i> 2457T $\Delta$ <i>ipaB</i> | pDSW206-lpaB D347C |  | $\Delta$ <i>ipaB</i> expressing lpaB D347C | This study |
| <i>S. flexneri</i> 2457T $\Delta$ <i>ipaB</i> | pDSW206-lpaB A348C |  | $\Delta$ <i>ipaB</i> expressing lpaB A348C | This study |
| <i>S. flexneri</i> 2457T $\Delta$ <i>ipaB</i> | pDSW206-lpaB V350C |  | $\Delta$ <i>ipaB</i> expressing lpaB V350C | This study |
| <i>S. flexneri</i> 2457T $\Delta$ <i>ipaB</i> | pDSW206-lpaB Q351C |  | $\Delta$ <i>ipaB</i> expressing lpaB Q351C | This study |
| <i>S. flexneri</i> 2457T $\Delta$ <i>ipaB</i> | pDSW206-lpaB A352C |  | $\Delta$ <i>ipaB</i> expressing lpaB A352C | This study |
| <i>S. flexneri</i> 2457T $\Delta$ <i>ipaB</i> | pDSW206-lpaB A353C |  | $\Delta$ <i>ipaB</i> expressing lpaB A353C | This study |
| <i>S. flexneri</i> 2457T $\Delta$ <i>ipaB</i> | pDSW206-lpaB T354C |  | $\Delta$ <i>ipaB</i> expressing lpaB T354C | This study |
| <i>S. flexneri</i> 2457T $\Delta$ <i>ipaB</i> | pDSW206-lpaB G355C |  | $\Delta$ <i>ipaB</i> expressing lpaB G355C | This study |
| <i>S. flexneri</i> 2457T $\Delta$ <i>ipaB</i> | pDSW206-lpaB N356C |  | $\Delta$ <i>ipaB</i> expressing lpaB N356C | This study |
| <i>S. flexneri</i> 2457T $\Delta$ <i>ipaB</i> | pDSW206-lpaB S357C |  | $\Delta$ <i>ipaB</i> expressing lpaB S357C | This study |
| <i>S. flexneri</i> 2457T $\Delta$ <i>ipaB</i> | pDSW206-lpaB F358C |  | $\Delta$ <i>ipaB</i> expressing lpaB F358C | This study |
| <i>S. flexneri</i> 2457T $\Delta$ <i>ipaB</i> | pDSW206-lpaB M359C |  | $\Delta$ <i>ipaB</i> expressing lpaB M359C | This study |
| <i>S. flexneri</i> 2457T $\Delta$ <i>ipaB</i> | pDSW206-lpaB Q361C |  | $\Delta$ <i>ipaB</i> expressing lpaB Q361C | This study |
| <i>S. flexneri</i> 2457T $\Delta$ <i>ipaB</i> | pDSW206-lpaB A362C |  | $\Delta$ <i>ipaB</i> expressing lpaB A362C | This study |
| <i>S. flexneri</i> 2457T $\Delta$ <i>ipaB</i> | pDSW206-lpaB L363C |  | $\Delta$ <i>ipaB</i> expressing lpaB L363C | This study |
| <i>S. flexneri</i> 2457T $\Delta$ <i>ipaB</i> | pDSW206-lpaB N364C |  | $\Delta$ <i>ipaB</i> expressing lpaB N364C | This study |

|                                               |                    |  |                                            |            |
|-----------------------------------------------|--------------------|--|--------------------------------------------|------------|
| <i>S. flexneri</i> 2457T $\Delta$ <i>ipaB</i> | pDSW206-lpaB P365C |  | $\Delta$ <i>ipaB</i> expressing lpaB P365C | This study |
| <i>S. flexneri</i> 2457T $\Delta$ <i>ipaB</i> | pDSW206-lpaB I366C |  | $\Delta$ <i>ipaB</i> expressing lpaB I366C | This study |
| <i>S. flexneri</i> 2457T $\Delta$ <i>ipaB</i> | pDSW206-lpaB M367C |  | $\Delta$ <i>ipaB</i> expressing lpaB M367C | This study |
| <i>S. flexneri</i> 2457T $\Delta$ <i>ipaB</i> | pDSW206-lpaB K368C |  | $\Delta$ <i>ipaB</i> expressing lpaB K368C | This study |
| <i>S. flexneri</i> 2457T $\Delta$ <i>ipaB</i> | pDSW206-lpaB A369C |  | $\Delta$ <i>ipaB</i> expressing lpaB A369C | This study |
| <i>S. flexneri</i> 2457T $\Delta$ <i>ipaB</i> | pDSW206-lpaB E372C |  | $\Delta$ <i>ipaB</i> expressing lpaB E372C | This study |
| <i>S. flexneri</i> 2457T $\Delta$ <i>ipaB</i> | pDSW206-lpaB P373C |  | $\Delta$ <i>ipaB</i> expressing lpaB P373C | This study |
| <i>S. flexneri</i> 2457T $\Delta$ <i>ipaB</i> | pDSW206-lpaB L374C |  | $\Delta$ <i>ipaB</i> expressing lpaB L374C | This study |
| <i>S. flexneri</i> 2457T $\Delta$ <i>ipaB</i> | pDSW206-lpaB I375C |  | $\Delta$ <i>ipaB</i> expressing lpaB I375C | This study |
| <i>S. flexneri</i> 2457T $\Delta$ <i>ipaB</i> | pDSW206-lpaB K376C |  | $\Delta$ <i>ipaB</i> expressing lpaB K376C | This study |
| <i>S. flexneri</i> 2457T $\Delta$ <i>ipaB</i> | pDSW206-lpaB L378C |  | $\Delta$ <i>ipaB</i> expressing lpaB L378C | This study |
| <i>S. flexneri</i> 2457T $\Delta$ <i>ipaB</i> | pDSW206-lpaB S379C |  | $\Delta$ <i>ipaB</i> expressing lpaB S379C | This study |
| <i>S. flexneri</i> 2457T $\Delta$ <i>ipaB</i> | pDSW206-lpaB D380C |  | $\Delta$ <i>ipaB</i> expressing lpaB D380C | This study |
| <i>S. flexneri</i> 2457T $\Delta$ <i>ipaB</i> | pDSW206-lpaB A381C |  | $\Delta$ <i>ipaB</i> expressing lpaB A381C | This study |
| <i>S. flexneri</i> 2457T $\Delta$ <i>ipaB</i> | pDSW206-lpaB F382C |  | $\Delta$ <i>ipaB</i> expressing lpaB F382C | This study |
| <i>S. flexneri</i> 2457T $\Delta$ <i>ipaB</i> | pDSW206-lpaB T383C |  | $\Delta$ <i>ipaB</i> expressing lpaB T383C | This study |
| <i>S. flexneri</i> 2457T $\Delta$ <i>ipaB</i> | pDSW206-lpaB K384C |  | $\Delta$ <i>ipaB</i> expressing lpaB K384C | This study |

|                                               |                    |  |                                            |            |
|-----------------------------------------------|--------------------|--|--------------------------------------------|------------|
| <i>S. flexneri</i> 2457T $\Delta$ <i>ipaB</i> | pDSW206-lpaB M385C |  | $\Delta$ <i>ipaB</i> expressing lpaB M385C | This study |
| <i>S. flexneri</i> 2457T $\Delta$ <i>ipaB</i> | pDSW206-lpaB L386C |  | $\Delta$ <i>ipaB</i> expressing lpaB L386C | This study |
| <i>S. flexneri</i> 2457T $\Delta$ <i>ipaB</i> | pDSW206-lpaB E387C |  | $\Delta$ <i>ipaB</i> expressing lpaB E387C | This study |
| <i>S. flexneri</i> 2457T $\Delta$ <i>ipaB</i> | pDSW206-lpaB G388C |  | $\Delta$ <i>ipaB</i> expressing lpaB G388C | This study |
| <i>S. flexneri</i> 2457T $\Delta$ <i>ipaB</i> | pDSW206-lpaB L389C |  | $\Delta$ <i>ipaB</i> expressing lpaB L389C | This study |
| <i>S. flexneri</i> 2457T $\Delta$ <i>ipaB</i> | pDSW206-lpaB G390C |  | $\Delta$ <i>ipaB</i> expressing lpaB G390C | This study |
| <i>S. flexneri</i> 2457T $\Delta$ <i>ipaB</i> | pDSW206-lpaB V391C |  | $\Delta$ <i>ipaB</i> expressing lpaB V391C | This study |
| <i>S. flexneri</i> 2457T $\Delta$ <i>ipaB</i> | pDSW206-lpaB D392C |  | $\Delta$ <i>ipaB</i> expressing lpaB D392C | This study |
| <i>S. flexneri</i> 2457T $\Delta$ <i>ipaB</i> | pDSW206-lpaB S393C |  | $\Delta$ <i>ipaB</i> expressing lpaB S393C | This study |
| <i>S. flexneri</i> 2457T $\Delta$ <i>ipaB</i> | pDSW206-lpaB K394C |  | $\Delta$ <i>ipaB</i> expressing lpaB K394C | This study |
| <i>S. flexneri</i> 2457T $\Delta$ <i>ipaB</i> | pDSW206-lpaB K395C |  | $\Delta$ <i>ipaB</i> expressing lpaB K395C | This study |
| <i>S. flexneri</i> 2457T $\Delta$ <i>ipaB</i> | pDSW206-lpaB A396C |  | $\Delta$ <i>ipaB</i> expressing lpaB A396C | This study |
| <i>S. flexneri</i> 2457T $\Delta$ <i>ipaB</i> | pDSW206-lpaB M398C |  | $\Delta$ <i>ipaB</i> expressing lpaB M398C | This study |
| <i>S. flexneri</i> 2457T $\Delta$ <i>ipaB</i> | pDSW206-lpaB I399C |  | $\Delta$ <i>ipaB</i> expressing lpaB I399C | This study |
| <i>S. flexneri</i> 2457T $\Delta$ <i>ipaB</i> | pDSW206-lpaB G400C |  | $\Delta$ <i>ipaB</i> expressing lpaB G400C | This study |
| <i>S. flexneri</i> 2457T $\Delta$ <i>ipaB</i> | pDSW206-lpaB S401C |  | $\Delta$ <i>ipaB</i> expressing lpaB S401C | This study |
| <i>S. flexneri</i> 2457T $\Delta$ <i>ipaB</i> | pDSW206-lpaB I402C |  | $\Delta$ <i>ipaB</i> expressing lpaB I402C | This study |

|                                               |                    |  |                                            |            |
|-----------------------------------------------|--------------------|--|--------------------------------------------|------------|
| <i>S. flexneri</i> 2457T $\Delta$ <i>ipaB</i> | pDSW206-IpaB L403C |  | $\Delta$ <i>ipaB</i> expressing IpaB L403C | This study |
| <i>S. flexneri</i> 2457T $\Delta$ <i>ipaB</i> | pDSW206-IpaB G404C |  | $\Delta$ <i>ipaB</i> expressing IpaB G404C | This study |
| <i>S. flexneri</i> 2457T $\Delta$ <i>ipaB</i> | pDSW206-IpaB A405C |  | $\Delta$ <i>ipaB</i> expressing IpaB A405C | This study |
| <i>S. flexneri</i> 2457T $\Delta$ <i>ipaB</i> | pDSW206-IpaB I406C |  | $\Delta$ <i>ipaB</i> expressing IpaB I406C | This study |
| <i>S. flexneri</i> 2457T $\Delta$ <i>ipaB</i> | pDSW206-IpaB A407C |  | $\Delta$ <i>ipaB</i> expressing IpaB A407C | This study |
| <i>S. flexneri</i> 2457T $\Delta$ <i>ipaB</i> | pDSW206-IpaB G408C |  | $\Delta$ <i>ipaB</i> expressing IpaB G408C | This study |
| <i>S. flexneri</i> 2457T $\Delta$ <i>ipaB</i> | pDSW206-IpaB A409C |  | $\Delta$ <i>ipaB</i> expressing IpaB A409C | This study |
| <i>S. flexneri</i> 2457T $\Delta$ <i>ipaB</i> | pDSW206-IpaB L410C |  | $\Delta$ <i>ipaB</i> expressing IpaB L410C | This study |
| <i>S. flexneri</i> 2457T $\Delta$ <i>ipaB</i> | pDSW206-IpaB V411C |  | $\Delta$ <i>ipaB</i> expressing IpaB V411C | This study |
| <i>S. flexneri</i> 2457T $\Delta$ <i>ipaB</i> | pDSW206-IpaB L412C |  | $\Delta$ <i>ipaB</i> expressing IpaB L412C | This study |
| <i>S. flexneri</i> 2457T $\Delta$ <i>ipaB</i> | pDSW206-IpaB V413C |  | $\Delta$ <i>ipaB</i> expressing IpaB V413C | This study |
| <i>S. flexneri</i> 2457T $\Delta$ <i>ipaB</i> | pDSW206-IpaB A414C |  | $\Delta$ <i>ipaB</i> expressing IpaB A414C | This study |
| <i>S. flexneri</i> 2457T $\Delta$ <i>ipaB</i> | pDSW206-IpaB A415C |  | $\Delta$ <i>ipaB</i> expressing IpaB A415C | This study |
| <i>S. flexneri</i> 2457T $\Delta$ <i>ipaB</i> | pDSW206-IpaB V416C |  | $\Delta$ <i>ipaB</i> expressing IpaB V416C | This study |
| <i>S. flexneri</i> 2457T $\Delta$ <i>ipaB</i> | pDSW206-IpaB V417C |  | $\Delta$ <i>ipaB</i> expressing IpaB V417C | This study |
| <i>S. flexneri</i> 2457T $\Delta$ <i>ipaB</i> | pDSW206-IpaB L418C |  | $\Delta$ <i>ipaB</i> expressing IpaB L418C | This study |
| <i>S. flexneri</i> 2457T $\Delta$ <i>ipaB</i> | pDSW206-IpaB V419C |  | $\Delta$ <i>ipaB</i> expressing IpaB V419C | This study |

|                                               |                          |             |                                                              |                     |
|-----------------------------------------------|--------------------------|-------------|--------------------------------------------------------------|---------------------|
| <i>S. flexneri</i> 2457T $\Delta$ <i>ipaB</i> | pDSW206-IpaB A420C       |             | $\Delta$ <i>ipaB</i> expressing IpaB A420C                   | This study          |
| <i>S. flexneri</i> 2457T $\Delta$ <i>ipaB</i> | pDSW206-IpaB A426C       |             | $\Delta$ <i>ipaB</i> expressing IpaB A426C                   | This study          |
| <i>S. flexneri</i> 2457T $\Delta$ <i>ipaB</i> | pDSW206-IpaB A427C       |             | $\Delta$ <i>ipaB</i> expressing IpaB A427C                   | This study          |
| <i>S. flexneri</i> 2457T $\Delta$ <i>ipaB</i> | pDSW206-IpaB A428C       |             | $\Delta$ <i>ipaB</i> expressing IpaB A428C                   | This study          |
| <i>S. flexneri</i> 2457T $\Delta$ <i>ipaB</i> | pDSW206-IpaB S454C       |             | $\Delta$ <i>ipaB</i> expressing IpaB S454C                   | This study          |
| <i>S. flexneri</i> 2457T $\Delta$ <i>ipaB</i> | pDSW206-wildtype<br>IpaB | pNG162-Afa1 | $\Delta$ <i>ipaB</i> expressing wildtype IpaB and<br>adhesin | Laboratory<br>stock |
| <i>S. flexneri</i> 2457T $\Delta$ <i>ipaB</i> | pDSW206-IpaB I313C       | pNG162-Afa1 | $\Delta$ <i>ipaB</i> expressing IpaB I313C and<br>adhesin    | This study          |
| <i>S. flexneri</i> 2457T $\Delta$ <i>ipaB</i> | pDSW206-IpaB L314C       | pNG162-Afa1 | $\Delta$ <i>ipaB</i> expressing IpaB L314C and<br>adhesin    | This study          |
| <i>S. flexneri</i> 2457T $\Delta$ <i>ipaB</i> | pDSW206-IpaB G315C       | pNG162-Afa1 | $\Delta$ <i>ipaB</i> expressing IpaB G315C and<br>adhesin    | This study          |
| <i>S. flexneri</i> 2457T $\Delta$ <i>ipaB</i> | pDSW206-IpaB A316C       | pNG162-Afa1 | $\Delta$ <i>ipaB</i> expressing IpaB A316C and<br>adhesin    | This study          |
| <i>S. flexneri</i> 2457T $\Delta$ <i>ipaB</i> | pDSW206-IpaB L317C       | pNG162-Afa1 | $\Delta$ <i>ipaB</i> expressing IpaB L317C and<br>adhesin    | This study          |



|                                        |                    |             |                                                 |            |
|----------------------------------------|--------------------|-------------|-------------------------------------------------|------------|
| <i>S. flexneri</i> 2457T $\Delta ipaB$ | pDSW206-IpaB L318C | pNG162-Afa1 | $\Delta ipaB$ expressing IpaB L318C and adhesin | This study |
| <i>S. flexneri</i> 2457T $\Delta ipaB$ | pDSW206-IpaB T319C | pNG162-Afa1 | $\Delta ipaB$ expressing IpaB T319C and adhesin | This study |
| <i>S. flexneri</i> 2457T $\Delta ipaB$ | pDSW206-IpaB I320C | pNG162-Afa1 | $\Delta ipaB$ expressing IpaB I320C and adhesin | This study |
| <i>S. flexneri</i> 2457T $\Delta ipaB$ | pDSW206-IpaB V321C | pNG162-Afa1 | $\Delta ipaB$ expressing IpaB V321C and adhesin | This study |
| <i>S. flexneri</i> 2457T $\Delta ipaB$ | pDSW206-IpaB S322C | pNG162-Afa1 | $\Delta ipaB$ expressing IpaB S322C and adhesin | This study |
| <i>S. flexneri</i> 2457T $\Delta ipaB$ | pDSW206-IpaB V323C | pNG162-Afa1 | $\Delta ipaB$ expressing IpaB V323C and adhesin | This study |
| <i>S. flexneri</i> 2457T $\Delta ipaB$ | pDSW206-IpaB V324C | pNG162-Afa1 | $\Delta ipaB$ expressing IpaB V324C and adhesin | This study |
| <i>S. flexneri</i> 2457T $\Delta ipaB$ | pDSW206-IpaB A325C | pNG162-Afa1 | $\Delta ipaB$ expressing IpaB A325C and adhesin | This study |

|                                        |                    |             |                                                 |            |
|----------------------------------------|--------------------|-------------|-------------------------------------------------|------------|
| <i>S. flexneri</i> 2457T $\Delta ipaB$ | pDSW206-IpaB A326C | pNG162-Afa1 | $\Delta ipaB$ expressing IpaB A326C and adhesin | This study |
| <i>S. flexneri</i> 2457T $\Delta ipaB$ | pDSW206-IpaB A327C | pNG162-Afa1 | $\Delta ipaB$ expressing IpaB A327C and adhesin | This study |
| <i>S. flexneri</i> 2457T $\Delta ipaB$ | pDSW206-IpaB F328C | pNG162-Afa1 | $\Delta ipaB$ expressing IpaB F328C and adhesin | This study |
| <i>S. flexneri</i> 2457T $\Delta ipaB$ | pDSW206-IpaB S329C | pNG162-Afa1 | $\Delta ipaB$ expressing IpaB S329C and adhesin | This study |
| <i>S. flexneri</i> 2457T $\Delta ipaB$ | pDSW206-IpaB G330C | pNG162-Afa1 | $\Delta ipaB$ expressing IpaB G330C and adhesin | This study |
| <i>S. flexneri</i> 2457T $\Delta ipaB$ | pDSW206-IpaB G331C | pNG162-Afa1 | $\Delta ipaB$ expressing IpaB G331C and adhesin | This study |
| <i>S. flexneri</i> 2457T $\Delta ipaB$ | pDSW206-IpaB A332C | pNG162-Afa1 | $\Delta ipaB$ expressing IpaB A332C and adhesin | This study |
| <i>S. flexneri</i> 2457T $\Delta ipaB$ | pDSW206-IpaB S333C | pNG162-Afa1 | $\Delta ipaB$ expressing IpaB S333C and adhesin | This study |

|                                        |                    |             |                                                 |            |
|----------------------------------------|--------------------|-------------|-------------------------------------------------|------------|
| <i>S. flexneri</i> 2457T $\Delta ipaB$ | pDSW206-IpaB L334C | pNG162-Afa1 | $\Delta ipaB$ expressing IpaB L334C and adhesin | This study |
| <i>S. flexneri</i> 2457T $\Delta ipaB$ | pDSW206-IpaB A335C | pNG162-Afa1 | $\Delta ipaB$ expressing IpaB A335C and adhesin | This study |
| <i>S. flexneri</i> 2457T $\Delta ipaB$ | pDSW206-IpaB L336C | pNG162-Afa1 | $\Delta ipaB$ expressing IpaB L336C and adhesin | This study |
| <i>S. flexneri</i> 2457T $\Delta ipaB$ | pDSW206-IpaB A337C | pNG162-Afa1 | $\Delta ipaB$ expressing IpaB A337C and adhesin | This study |
| <i>S. flexneri</i> 2457T $\Delta ipaB$ | pDSW206-IpaB A338C | pNG162-Afa1 | $\Delta ipaB$ expressing IpaB A338C and adhesin | This study |
| <i>S. flexneri</i> 2457T $\Delta ipaB$ | pDSW206-IpaB V339C | pNG162-Afa1 | $\Delta ipaB$ expressing IpaB V339C and adhesin | This study |
| <i>S. flexneri</i> 2457T $\Delta ipaB$ | pDSW206-IpaB G340C | pNG162-Afa1 | $\Delta ipaB$ expressing IpaB G340C and adhesin | This study |
| <i>S. flexneri</i> 2457T $\Delta ipaB$ | pDSW206-IpaB L341C | pNG162-Afa1 | $\Delta ipaB$ expressing IpaB L341C and adhesin | This study |

|                                        |                    |             |                                                 |            |
|----------------------------------------|--------------------|-------------|-------------------------------------------------|------------|
| <i>S. flexneri</i> 2457T $\Delta ipaB$ | pDSW206-IpaB A342C | pNG162-Afa1 | $\Delta ipaB$ expressing IpaB A342C and adhesin | This study |
| <i>S. flexneri</i> 2457T $\Delta ipaB$ | pDSW206-IpaB L343C | pNG162-Afa1 | $\Delta ipaB$ expressing IpaB L343C and adhesin | This study |
| <i>S. flexneri</i> 2457T $\Delta ipaB$ | pDSW206-IpaB M344C | pNG162-Afa1 | $\Delta ipaB$ expressing IpaB M344C and adhesin | This study |
| <i>S. flexneri</i> 2457T $\Delta ipaB$ | pDSW206-IpaB V345C | pNG162-Afa1 | $\Delta ipaB$ expressing IpaB V345C and adhesin | This study |
| <i>S. flexneri</i> 2457T $\Delta ipaB$ | pDSW206-IpaB T346C | pNG162-Afa1 | $\Delta ipaB$ expressing IpaB T346C and adhesin | This study |
| <i>S. flexneri</i> 2457T $\Delta ipaB$ | pDSW206-IpaB D347C | pNG162-Afa1 | $\Delta ipaB$ expressing IpaB D347C and adhesin | This study |
| <i>S. flexneri</i> 2457T $\Delta ipaB$ | pDSW206-IpaB A348C | pNG162-Afa1 | $\Delta ipaB$ expressing IpaB A348C and adhesin | This study |
| <i>S. flexneri</i> 2457T $\Delta ipaB$ | pDSW206-IpaB V350C | pNG162-Afa1 | $\Delta ipaB$ expressing IpaB V350C and adhesin | This study |

|                                               |                    |             |                                                        |            |
|-----------------------------------------------|--------------------|-------------|--------------------------------------------------------|------------|
| <i>S. flexneri</i> 2457T $\Delta$ <i>ipaB</i> | pDSW206-lpaB Q351C | pNG162-Afa1 | $\Delta$ <i>ipaB</i> expressing lpaB Q351C and adhesin | This study |
| <i>S. flexneri</i> 2457T $\Delta$ <i>ipaB</i> | pDSW206-lpaB A352C | pNG162-Afa1 | $\Delta$ <i>ipaB</i> expressing lpaB A352C and adhesin | This study |
| <i>S. flexneri</i> 2457T $\Delta$ <i>ipaB</i> | pDSW206-lpaB A353C | pNG162-Afa1 | $\Delta$ <i>ipaB</i> expressing lpaB A353C and adhesin | This study |
| <i>S. flexneri</i> 2457T $\Delta$ <i>ipaB</i> | pDSW206-lpaB T354C | pNG162-Afa1 | $\Delta$ <i>ipaB</i> expressing lpaB T354C and adhesin | This study |
| <i>S. flexneri</i> 2457T $\Delta$ <i>ipaB</i> | pDSW206-lpaB G355C | pNG162-Afa1 | $\Delta$ <i>ipaB</i> expressing lpaB G355C and adhesin | This study |
| <i>S. flexneri</i> 2457T $\Delta$ <i>ipaB</i> | pDSW206-lpaB N356C | pNG162-Afa1 | $\Delta$ <i>ipaB</i> expressing lpaB N356C and adhesin | This study |
| <i>S. flexneri</i> 2457T $\Delta$ <i>ipaB</i> | pDSW206-lpaB S357C | pNG162-Afa1 | $\Delta$ <i>ipaB</i> expressing lpaB S357C and adhesin | This study |
| <i>S. flexneri</i> 2457T $\Delta$ <i>ipaB</i> | pDSW206-lpaB F358C | pNG162-Afa1 | $\Delta$ <i>ipaB</i> expressing lpaB F358C and adhesin | This study |

|                                        |                    |             |                                                 |            |
|----------------------------------------|--------------------|-------------|-------------------------------------------------|------------|
| <i>S. flexneri</i> 2457T $\Delta ipaB$ | pDSW206-IpaB M359C | pNG162-Afa1 | $\Delta ipaB$ expressing IpaB M359C and adhesin | This study |
| <i>S. flexneri</i> 2457T $\Delta ipaB$ | pDSW206-IpaB Q361C | pNG162-Afa1 | $\Delta ipaB$ expressing IpaB Q361C and adhesin | This study |
| <i>S. flexneri</i> 2457T $\Delta ipaB$ | pDSW206-IpaB A362C | pNG162-Afa1 | $\Delta ipaB$ expressing IpaB A362C and adhesin | This study |
| <i>S. flexneri</i> 2457T $\Delta ipaB$ | pDSW206-IpaB L363C | pNG162-Afa1 | $\Delta ipaB$ expressing IpaB L363C and adhesin | This study |
| <i>S. flexneri</i> 2457T $\Delta ipaB$ | pDSW206-IpaB N364C | pNG162-Afa1 | $\Delta ipaB$ expressing IpaB N364C and adhesin | This study |
| <i>S. flexneri</i> 2457T $\Delta ipaB$ | pDSW206-IpaB P365C | pNG162-Afa1 | $\Delta ipaB$ expressing IpaB P365C and adhesin | This study |
| <i>S. flexneri</i> 2457T $\Delta ipaB$ | pDSW206-IpaB I366C | pNG162-Afa1 | $\Delta ipaB$ expressing IpaB I366C and adhesin | This study |
| <i>S. flexneri</i> 2457T $\Delta ipaB$ | pDSW206-IpaB M367C | pNG162-Afa1 | $\Delta ipaB$ expressing IpaB M367C and adhesin | This study |

|                                        |                    |             |                                                 |            |
|----------------------------------------|--------------------|-------------|-------------------------------------------------|------------|
| <i>S. flexneri</i> 2457T $\Delta ipaB$ | pDSW206-IpaB K368C | pNG162-Afa1 | $\Delta ipaB$ expressing IpaB K368C and adhesin | This study |
| <i>S. flexneri</i> 2457T $\Delta ipaB$ | pDSW206-IpaB A369C | pNG162-Afa1 | $\Delta ipaB$ expressing IpaB A369C and adhesin | This study |
| <i>S. flexneri</i> 2457T $\Delta ipaB$ | pDSW206-IpaB E372C | pNG162-Afa1 | $\Delta ipaB$ expressing IpaB E372C and adhesin | This study |
| <i>S. flexneri</i> 2457T $\Delta ipaB$ | pDSW206-IpaB P373C | pNG162-Afa1 | $\Delta ipaB$ expressing IpaB P373C and adhesin | This study |
| <i>S. flexneri</i> 2457T $\Delta ipaB$ | pDSW206-IpaB L374C | pNG162-Afa1 | $\Delta ipaB$ expressing IpaB L374C and adhesin | This study |
| <i>S. flexneri</i> 2457T $\Delta ipaB$ | pDSW206-IpaB I375C | pNG162-Afa1 | $\Delta ipaB$ expressing IpaB I375C and adhesin | This study |
| <i>S. flexneri</i> 2457T $\Delta ipaB$ | pDSW206-IpaB K376C | pNG162-Afa1 | $\Delta ipaB$ expressing IpaB K376C and adhesin | This study |
| <i>S. flexneri</i> 2457T $\Delta ipaB$ | pDSW206-IpaB L378C | pNG162-Afa1 | $\Delta ipaB$ expressing IpaB L378C and adhesin | This study |

|                                        |                    |             |                                                 |            |
|----------------------------------------|--------------------|-------------|-------------------------------------------------|------------|
| <i>S. flexneri</i> 2457T $\Delta ipaB$ | pDSW206-IpaB S379C | pNG162-Afa1 | $\Delta ipaB$ expressing IpaB S379C and adhesin | This study |
| <i>S. flexneri</i> 2457T $\Delta ipaB$ | pDSW206-IpaB D380C | pNG162-Afa1 | $\Delta ipaB$ expressing IpaB D380C and adhesin | This study |
| <i>S. flexneri</i> 2457T $\Delta ipaB$ | pDSW206-IpaB A381C | pNG162-Afa1 | $\Delta ipaB$ expressing IpaB A381C and adhesin | This study |
| <i>S. flexneri</i> 2457T $\Delta ipaB$ | pDSW206-IpaB F382C | pNG162-Afa1 | $\Delta ipaB$ expressing IpaB F382C and adhesin | This study |
| <i>S. flexneri</i> 2457T $\Delta ipaB$ | pDSW206-IpaB T383C | pNG162-Afa1 | $\Delta ipaB$ expressing IpaB T383C and adhesin | This study |
| <i>S. flexneri</i> 2457T $\Delta ipaB$ | pDSW206-IpaB K384C | pNG162-Afa1 | $\Delta ipaB$ expressing IpaB K384C and adhesin | This study |
| <i>S. flexneri</i> 2457T $\Delta ipaB$ | pDSW206-IpaB M385C | pNG162-Afa1 | $\Delta ipaB$ expressing IpaB M385C and adhesin | This study |
| <i>S. flexneri</i> 2457T $\Delta ipaB$ | pDSW206-IpaB L386C | pNG162-Afa1 | $\Delta ipaB$ expressing IpaB L386C and adhesin | This study |



|                                               |                    |             |                                                        |            |
|-----------------------------------------------|--------------------|-------------|--------------------------------------------------------|------------|
| <i>S. flexneri</i> 2457T $\Delta$ <i>ipaB</i> | pDSW206-IpaB E387C | pNG162-Afa1 | $\Delta$ <i>ipaB</i> expressing IpaB E387C and adhesin | This study |
| <i>S. flexneri</i> 2457T $\Delta$ <i>ipaB</i> | pDSW206-IpaB G388C | pNG162-Afa1 | $\Delta$ <i>ipaB</i> expressing IpaB G388C and adhesin | This study |
| <i>S. flexneri</i> 2457T $\Delta$ <i>ipaB</i> | pDSW206-IpaB L389C | pNG162-Afa1 | $\Delta$ <i>ipaB</i> expressing IpaB L389C and adhesin | This study |
| <i>S. flexneri</i> 2457T $\Delta$ <i>ipaB</i> | pDSW206-IpaB G390C | pNG162-Afa1 | $\Delta$ <i>ipaB</i> expressing IpaB G390C and adhesin | This study |
| <i>S. flexneri</i> 2457T $\Delta$ <i>ipaB</i> | pDSW206-IpaB V391C | pNG162-Afa1 | $\Delta$ <i>ipaB</i> expressing IpaB V391C and adhesin | This study |
| <i>S. flexneri</i> 2457T $\Delta$ <i>ipaB</i> | pDSW206-IpaB D392C | pNG162-Afa1 | $\Delta$ <i>ipaB</i> expressing IpaB D392C and adhesin | This study |
| <i>S. flexneri</i> 2457T $\Delta$ <i>ipaB</i> | pDSW206-IpaB S393C | pNG162-Afa1 | $\Delta$ <i>ipaB</i> expressing IpaB S393C and adhesin | This study |
| <i>S. flexneri</i> 2457T $\Delta$ <i>ipaB</i> | pDSW206-IpaB K394C | pNG162-Afa1 | $\Delta$ <i>ipaB</i> expressing IpaB K394C and adhesin | This study |

|                                        |                    |             |                                                 |            |
|----------------------------------------|--------------------|-------------|-------------------------------------------------|------------|
| <i>S. flexneri</i> 2457T $\Delta ipaB$ | pDSW206-IpaB K395C | pNG162-Afa1 | $\Delta ipaB$ expressing IpaB K395C and adhesin | This study |
| <i>S. flexneri</i> 2457T $\Delta ipaB$ | pDSW206-IpaB A396C | pNG162-Afa1 | $\Delta ipaB$ expressing IpaB A396C and adhesin | This study |
| <i>S. flexneri</i> 2457T $\Delta ipaB$ | pDSW206-IpaB M398C | pNG162-Afa1 | $\Delta ipaB$ expressing IpaB M398C and adhesin | This study |
| <i>S. flexneri</i> 2457T $\Delta ipaB$ | pDSW206-IpaB I399C | pNG162-Afa1 | $\Delta ipaB$ expressing IpaB I399C and adhesin | This study |
| <i>S. flexneri</i> 2457T $\Delta ipaB$ | pDSW206-IpaB G400C | pNG162-Afa1 | $\Delta ipaB$ expressing IpaB G400C and adhesin | This study |
| <i>S. flexneri</i> 2457T $\Delta ipaB$ | pDSW206-IpaB S401C | pNG162-Afa1 | $\Delta ipaB$ expressing IpaB S401C and adhesin | This study |
| <i>S. flexneri</i> 2457T $\Delta ipaB$ | pDSW206-IpaB I402C | pNG162-Afa1 | $\Delta ipaB$ expressing IpaB I402C and adhesin | This study |
| <i>S. flexneri</i> 2457T $\Delta ipaB$ | pDSW206-IpaB L403C | pNG162-Afa1 | $\Delta ipaB$ expressing IpaB L403C and adhesin | This study |

|                                        |                    |             |                                                 |            |
|----------------------------------------|--------------------|-------------|-------------------------------------------------|------------|
| <i>S. flexneri</i> 2457T $\Delta ipaB$ | pDSW206-IpaB G404C | pNG162-Afa1 | $\Delta ipaB$ expressing IpaB G404C and adhesin | This study |
| <i>S. flexneri</i> 2457T $\Delta ipaB$ | pDSW206-IpaB A405C | pNG162-Afa1 | $\Delta ipaB$ expressing IpaB A405C and adhesin | This study |
| <i>S. flexneri</i> 2457T $\Delta ipaB$ | pDSW206-IpaB I406C | pNG162-Afa1 | $\Delta ipaB$ expressing IpaB I406C and adhesin | This study |
| <i>S. flexneri</i> 2457T $\Delta ipaB$ | pDSW206-IpaB A407C | pNG162-Afa1 | $\Delta ipaB$ expressing IpaB A407C and adhesin | This study |
| <i>S. flexneri</i> 2457T $\Delta ipaB$ | pDSW206-IpaB G408C | pNG162-Afa1 | $\Delta ipaB$ expressing IpaB G408C and adhesin | This study |
| <i>S. flexneri</i> 2457T $\Delta ipaB$ | pDSW206-IpaB A409C | pNG162-Afa1 | $\Delta ipaB$ expressing IpaB A409C and adhesin | This study |
| <i>S. flexneri</i> 2457T $\Delta ipaB$ | pDSW206-IpaB L410C | pNG162-Afa1 | $\Delta ipaB$ expressing IpaB L410C and adhesin | This study |
| <i>S. flexneri</i> 2457T $\Delta ipaB$ | pDSW206-IpaB V411C | pNG162-Afa1 | $\Delta ipaB$ expressing IpaB V411C and adhesin | This study |

|                                        |                    |             |                                                 |            |
|----------------------------------------|--------------------|-------------|-------------------------------------------------|------------|
| <i>S. flexneri</i> 2457T $\Delta ipaB$ | pDSW206-IpaB L412C | pNG162-Afa1 | $\Delta ipaB$ expressing IpaB L412C and adhesin | This study |
| <i>S. flexneri</i> 2457T $\Delta ipaB$ | pDSW206-IpaB V413C | pNG162-Afa1 | $\Delta ipaB$ expressing IpaB V413C and adhesin | This study |
| <i>S. flexneri</i> 2457T $\Delta ipaB$ | pDSW206-IpaB A414C | pNG162-Afa1 | $\Delta ipaB$ expressing IpaB A414C and adhesin | This study |
| <i>S. flexneri</i> 2457T $\Delta ipaB$ | pDSW206-IpaB A415C | pNG162-Afa1 | $\Delta ipaB$ expressing IpaB A415C and adhesin | This study |
| <i>S. flexneri</i> 2457T $\Delta ipaB$ | pDSW206-IpaB V416C | pNG162-Afa1 | $\Delta ipaB$ expressing IpaB V416C and adhesin | This study |
| <i>S. flexneri</i> 2457T $\Delta ipaB$ | pDSW206-IpaB V417C | pNG162-Afa1 | $\Delta ipaB$ expressing IpaB V417C and adhesin | This study |
| <i>S. flexneri</i> 2457T $\Delta ipaB$ | pDSW206-IpaB L418C | pNG162-Afa1 | $\Delta ipaB$ expressing IpaB L418C and adhesin | This study |
| <i>S. flexneri</i> 2457T $\Delta ipaB$ | pDSW206-IpaB V419C | pNG162-Afa1 | $\Delta ipaB$ expressing IpaB V419C and adhesin | This study |

|                                            |                          |             |                                                 |            |
|--------------------------------------------|--------------------------|-------------|-------------------------------------------------|------------|
| <i>S. flexneri</i> 2457T $\Delta ipaB$     | pDSW206-IpaB A420C       | pNG162-Afa1 | $\Delta ipaB$ expressing IpaB A420C and adhesin | This study |
| <i>S. flexneri</i> 2457T $\Delta ipaB$     | pDSW206-IpaB A426C       | pNG162-Afa1 | $\Delta ipaB$ expressing IpaB A426C and adhesin | This study |
| <i>S. flexneri</i> 2457T $\Delta ipaB$     | pDSW206-IpaB A427C       | pNG162-Afa1 | $\Delta ipaB$ expressing IpaB A427C and adhesin | This study |
| <i>S. flexneri</i> 2457T $\Delta ipaB$     | pDSW206-IpaB A428C       | pNG162-Afa1 | $\Delta ipaB$ expressing IpaB A428C and adhesin | This study |
| <i>S. flexneri</i> 2457T $\Delta ipaB$     | pDSW206-IpaB S454C       | pNG162-Afa1 | $\Delta ipaB$ expressing IpaB S454C and adhesin | This study |
| <i>S. flexneri</i> 2457T<br>$\Delta ipaBC$ | pDSW206-wildtype<br>IpaB |             | $\Delta ipaBC$ expressing wildtype IpaB         | This study |
| <i>S. flexneri</i> 2457T<br>$\Delta ipaBC$ | pDSW206-IpaB S454C       |             | $\Delta ipaBC$ expressing IpaB S454C            | This study |

## References

1. Labigne-Roussel AF, Lark D, Schoolnik G, Falkow S. Cloning and expression of an afimbrial adhesin (AFA-I) responsible for P blood group-independent, mannose-resistant hemagglutination from a pyelonephritic *Escherichia coli* strain. *Infect Immun*. 1984;46(1):251-9. Epub 1984/10/01. doi: 10.1128/iai.46.1.251-259.1984. PubMed PMID: 6148308; PMCID: PMC261465.
2. Labrec EH, Schneider H, Magnani TJ, Formal SB. Epithelial Cell Penetration as an Essential Step in the Pathogenesis of Bacillary Dysentery. *J Bacteriol*. 1964;88(5):1503-18. Epub 1964/11/01. doi: 10.1128/jb.88.5.1503-1518.1964. PubMed PMID: 16562000; PMCID: PMC277436.
